# Supplementary material
Source: bioRxiv or medRxiv preprint supplement (https://www.biorxiv.org/highwire/filestream/72075/field_highwire_adjunct_files/0/149526-1.pdf)
Supplement: Supplementary file [file 149526-1.pdf]

## Supporting material

Oxytocin gene networks in the human brain: A gene expression and large-scale fMRI meta-analysis study

Daniel S. Quintana\*, Jaroslav Rokicki, Dennis van der Meer, Dag Alnæs, Tobias Kaufmann, Aldo Córdova Palomera, Ingrid Dieset, Ole A. Andreassen, and Lars T. Westlye

**\* Corresponding author:** Daniel S. Quintana, NORMENT, KG Jebsen Centre for Psychosis Research, Building 49, Oslo University Hospital, Ullevål, Kirkeveien 166, PO Box 4956 Nydalen, N- 0424 Oslo, Norway, Ph: +47 23 02 73 50, fax: +47 23 02 73 33, email: [daniel.quintana@medisin.uio.no](mailto:daniel.quintana@medisin.uio.no)

**Supplementary Figure S1. Creation of expression maps.** First, brain boundaries were labeled (a). Spaces were then divided into simplices, which were triangles in two-dimensional cases (note that not all possible triangles are marked in the image) (b). We then performed linearly interpolating within each simplex (c)

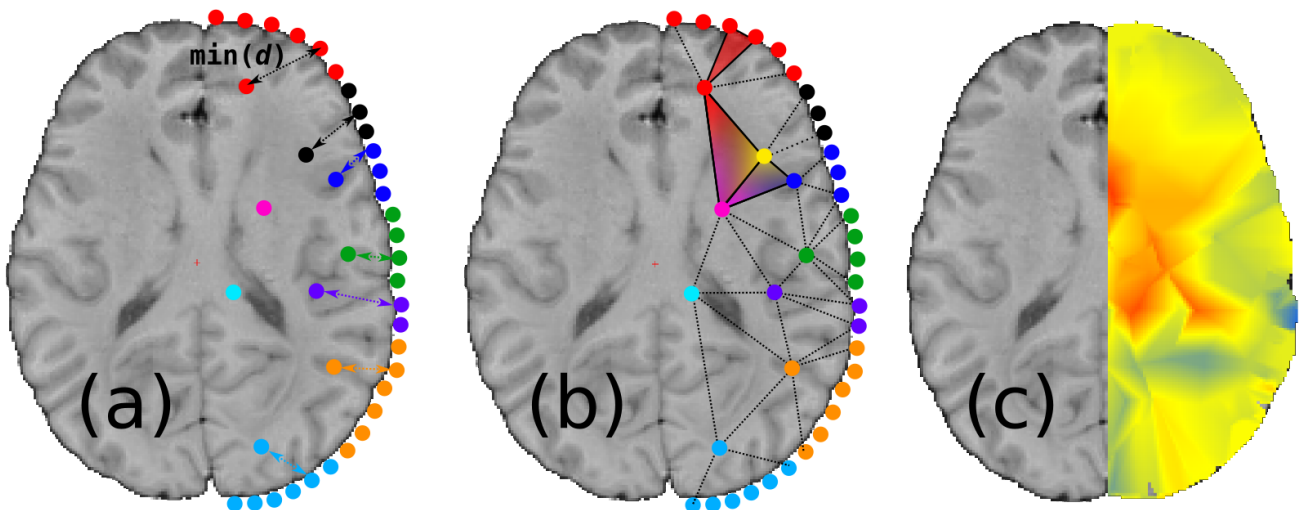

**Supplementary Figure S2. The comparison of Allen and GTEx datasets.** Median expression data from 10 distinct regions from the GTEx database were compared to the median expression of the same regions from the Allen database. Medians from the Allen dataset were extracted from the raw data by calculating the median expression of the GTEx regions using available atlases. Spearman correlations were then calculated to assess the relationship of these datasets. <sup>a</sup> AAL atlas: Amygdala, Caudate, Cerebellum, Hippocampus, Putamen; Talairach atlas: BA24, BA9, Hypothalamus, Substantia Nigra; “Hammers\_mith atlas”: Nucleus Accumbens

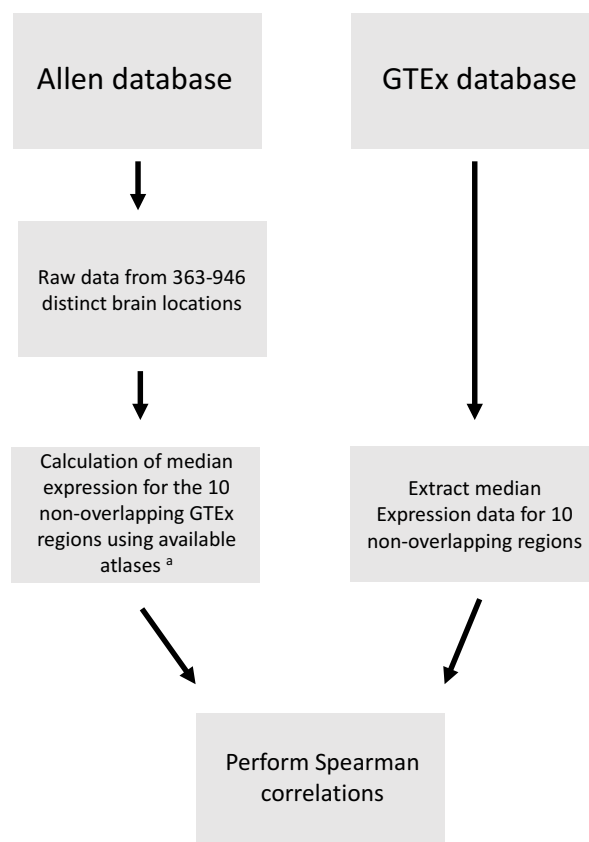

**Supplementary Figure S3. Out-of-sample validation of the central co-expression of oxytocin, dopaminergic, muscarinic acetylcholine, and vasopressin gene sets.** As described in Figure S2, median expression data was extracted from the Allen (a) and GTEx (b) datasets. Values represent Spearman correlation coefficients. Complete linkage clustering was used to identify 3 clustering groups (black squares). The key constituents of the oxytocin pathway (*OXTR*, *CD38*, *OXT*) were highlighted by green rectangles. In both datasets, *OXTR* and *CD38* clustered together, along with *DRD2*, *CHRM4*, and *DRD1* genes.

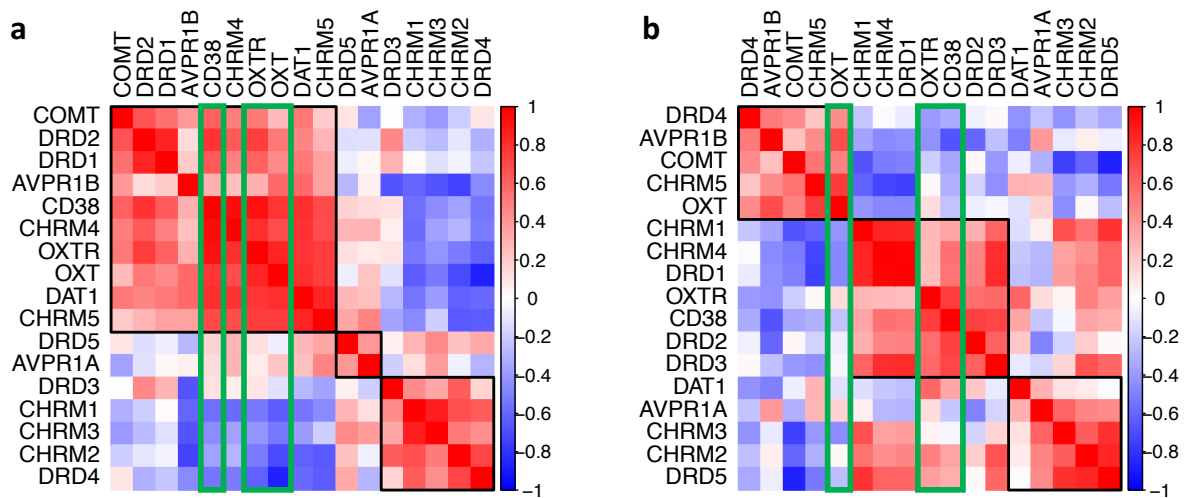

**Supplementary Figure S4. The central expression of OXT.** Means and standard errors are presented. \* > 0.05 (FDR corrected).

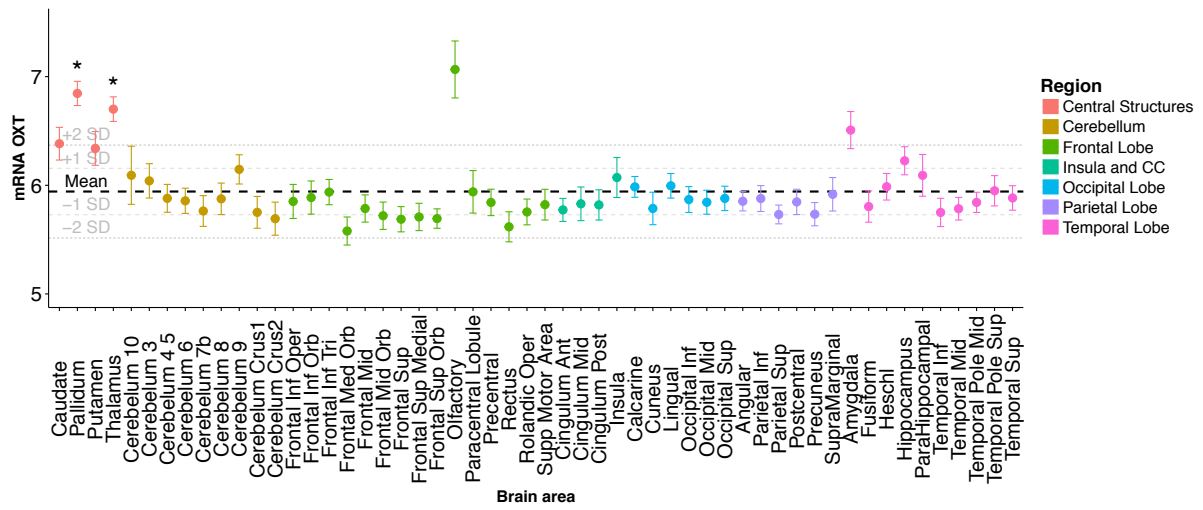

**Supplementary Figure S5. The central expression of dopaminergic genes DRD1 (a), DRD2 (b), DRD3 (c), DRD4 (d), DRD5 (e), COMT (f), and DAT1 (g) Means and standard errors are presented. \* > 0.05 (FDR corrected).**

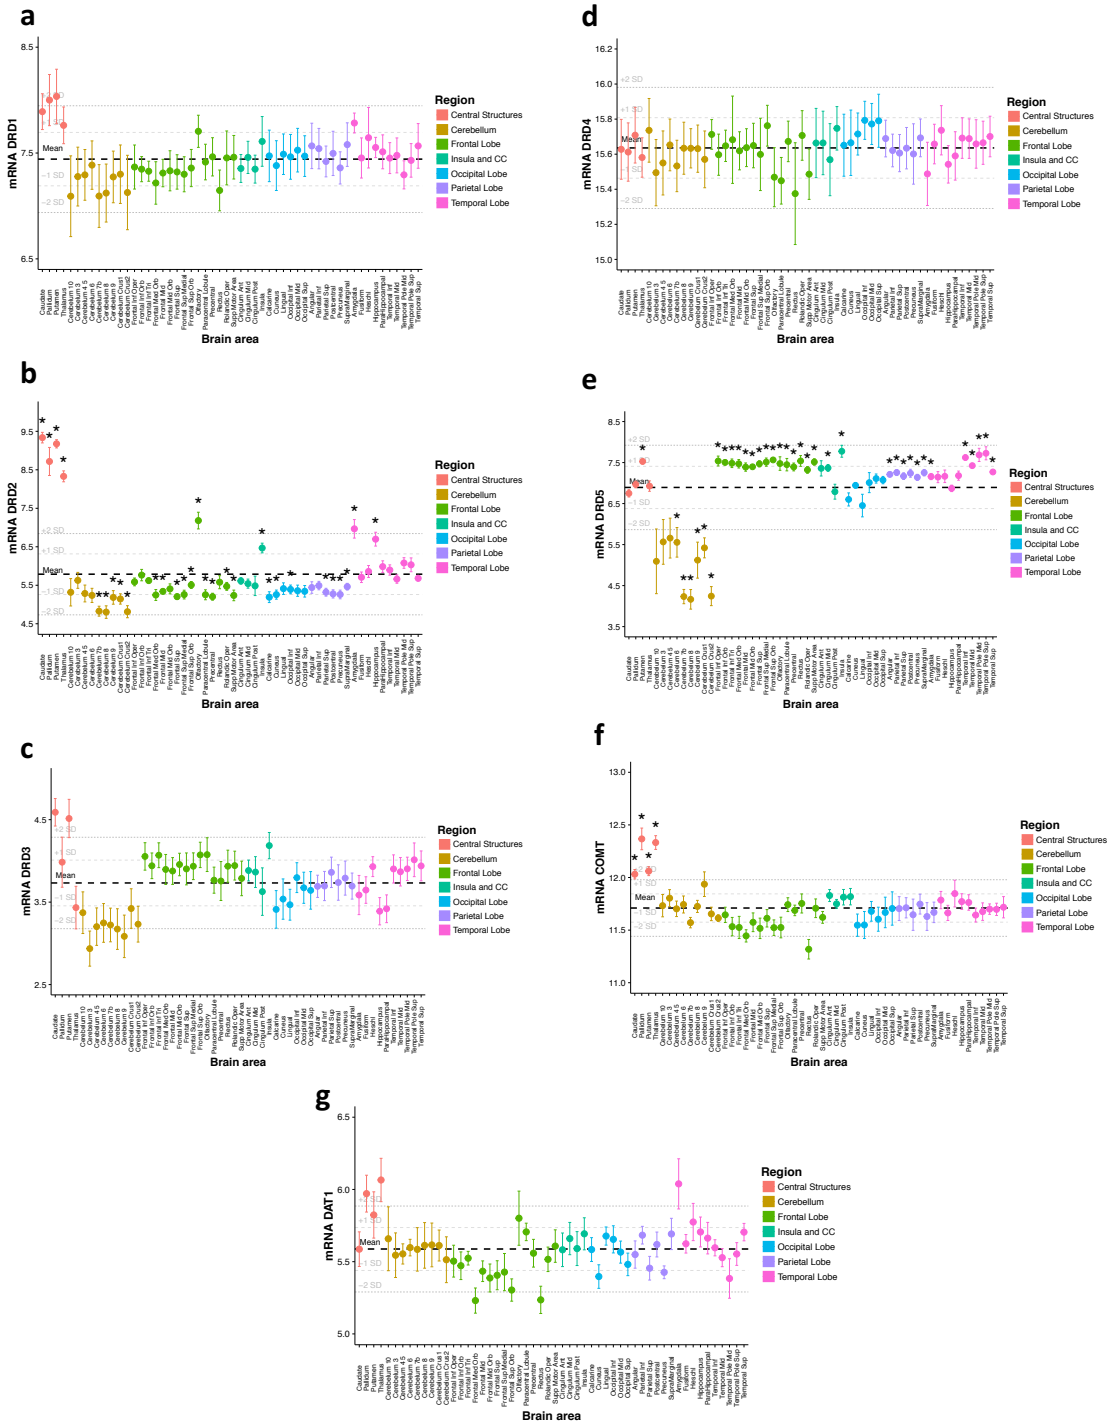

**Supplementary Figure S6. The central expression of muscarinic acetylcholine pathway genes CHRM1 (a), CHRM2 (b), CHRM3 (c), CHRM4 (d), and CHRM5 (e). Means and standard errors are presented. \* > 0.05 (FDR corrected).**

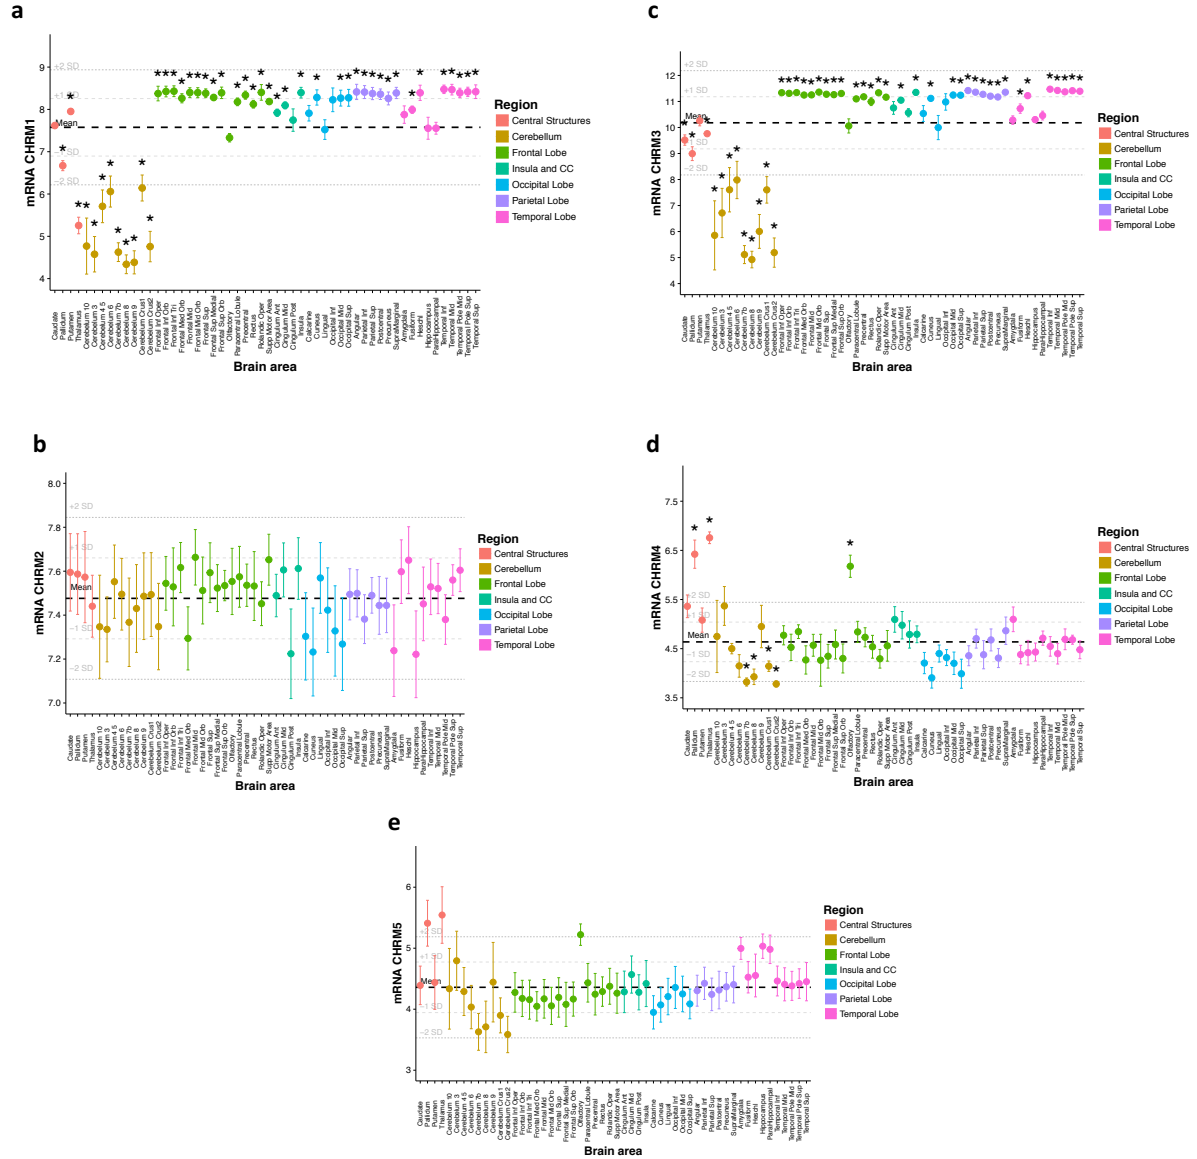

**Supplementary Figure S7. The central expression of vasopressin genes AVPR1A (a), and AVPR1B (b). Means and standard errors are presented. \* > 0.05 (FDR corrected).**

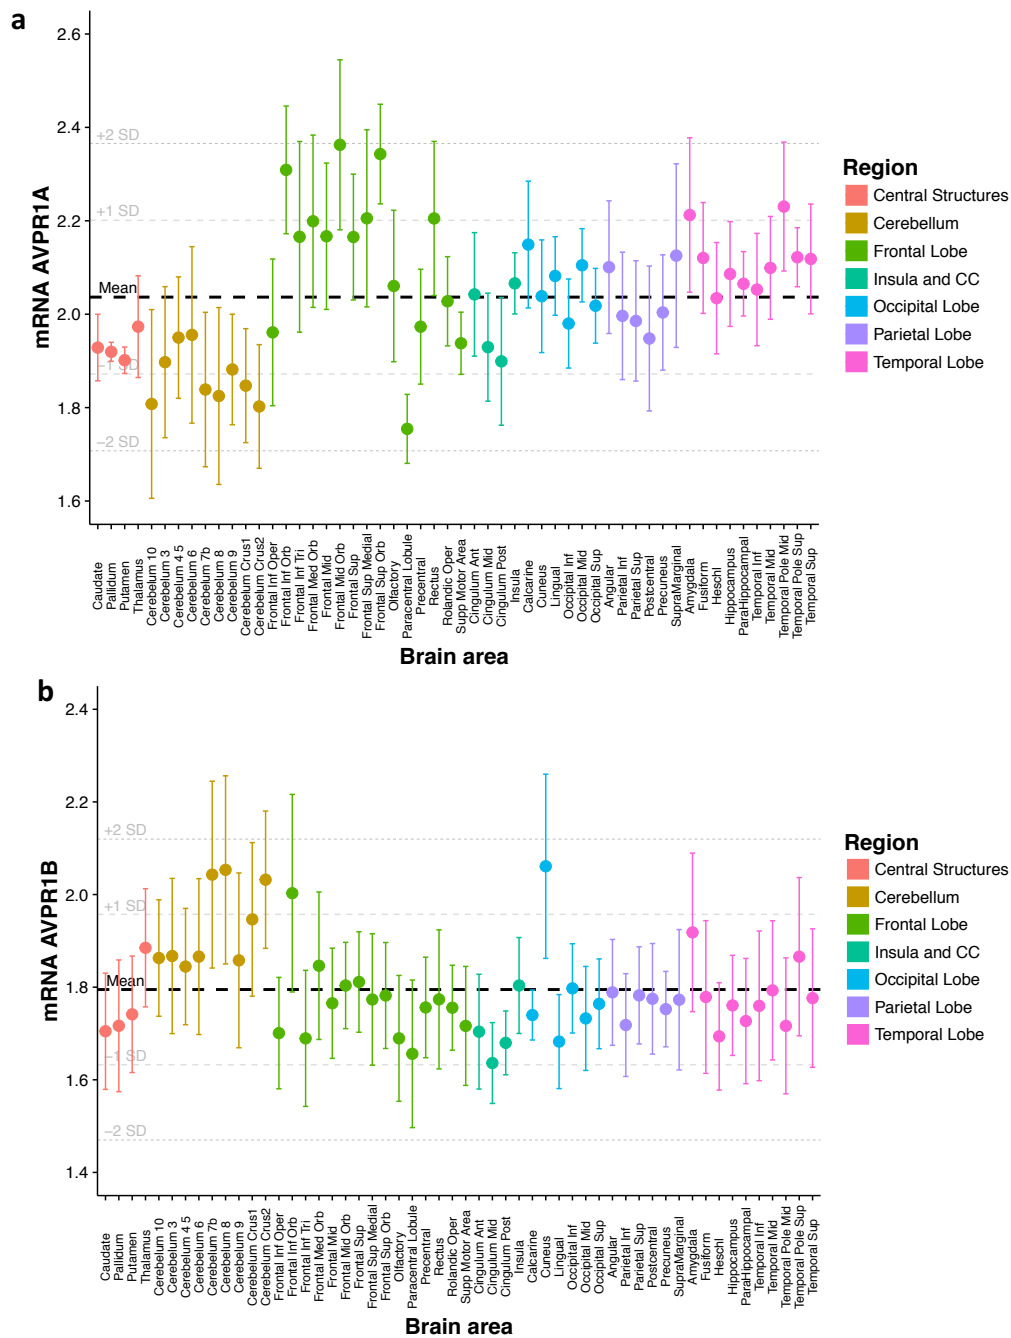



**Supplementary Figure S8. Sex differences in central oxytocin pathway mRNA expression.** Box and whisker plots demonstrating median central expression of *OXT* (a), *CD38* (b), and *OXT* (c) in males (blue boxes) and females (red boxes) over 12 brain regions. Data was extracted from the GTEx database, with gene expression presented as log transformed units.

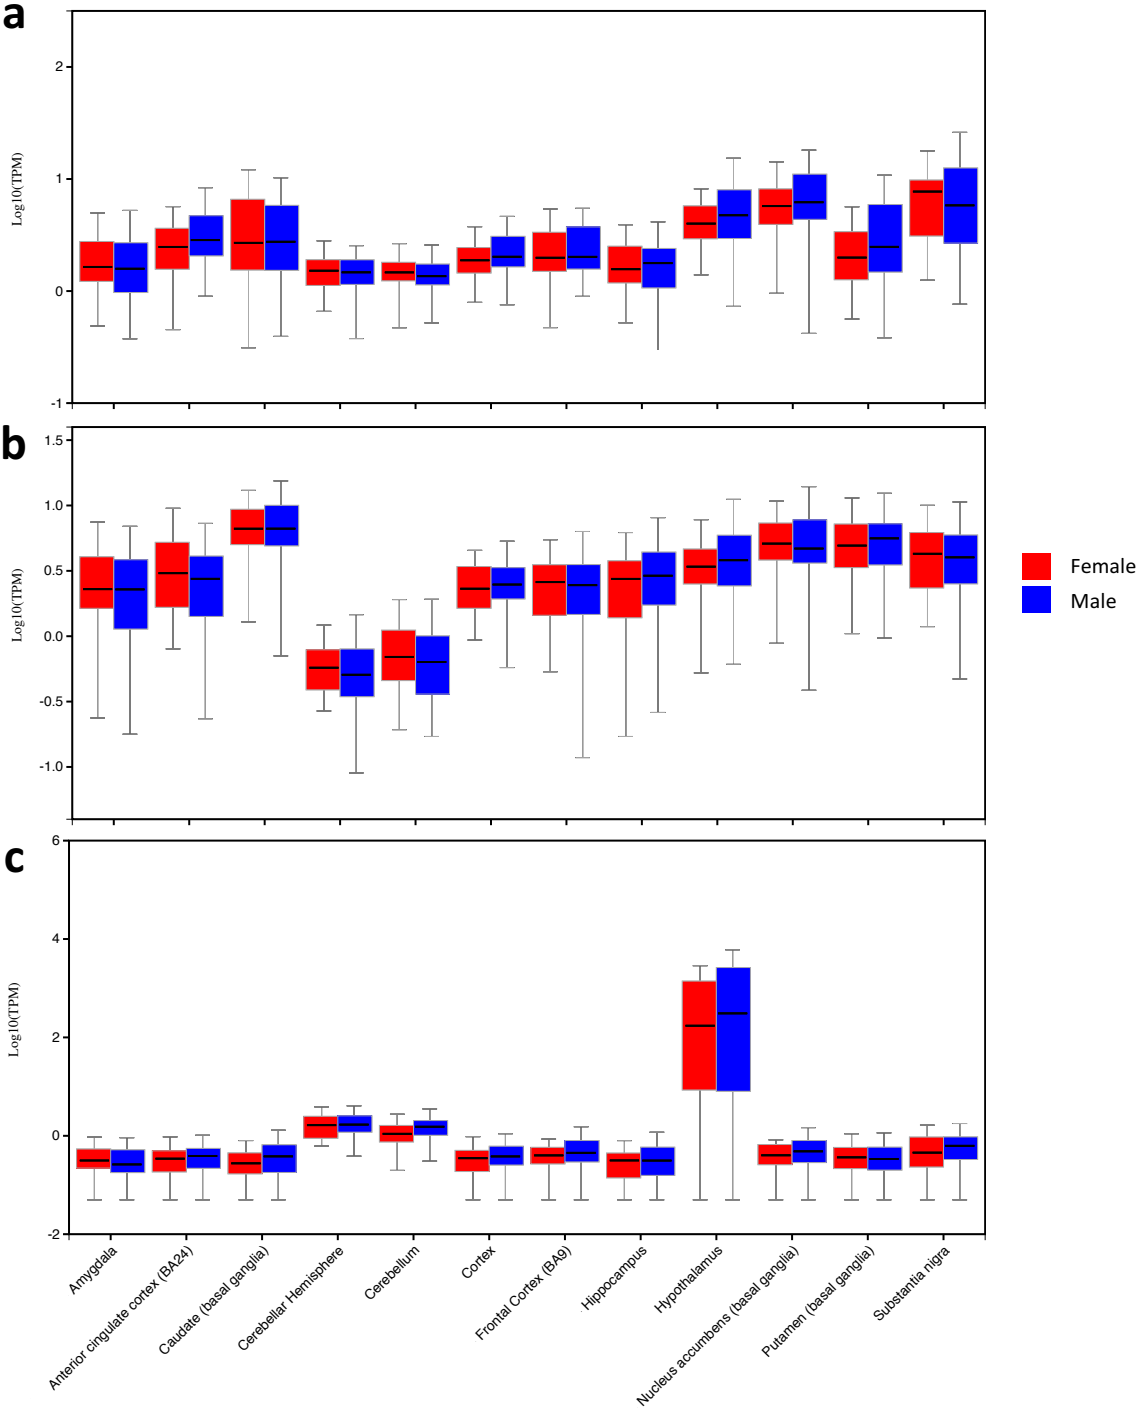

**Supplementary Figure S9. Central co-expression of *OXTR*, *OXT*, and *CD38* with selected dopaminergic, muscarinic acetylcholine, and vasopressin gene sets across the brain and the cortex only.** Spearman's correlation coefficients are presented for the full brain (a) and the cortex only (b). Spearman's correlations are visualized on a density distribution demonstrating all co-expression correlations between *OXTR*, *CD38*, and *OXT* and all genes in the complete oxytocinergic (n = 94), cholinergic (n = 79), and dopaminergic (n = 63) gene sets (see Dataset S1 for full lists). Genes of interest from each selected set are identified.

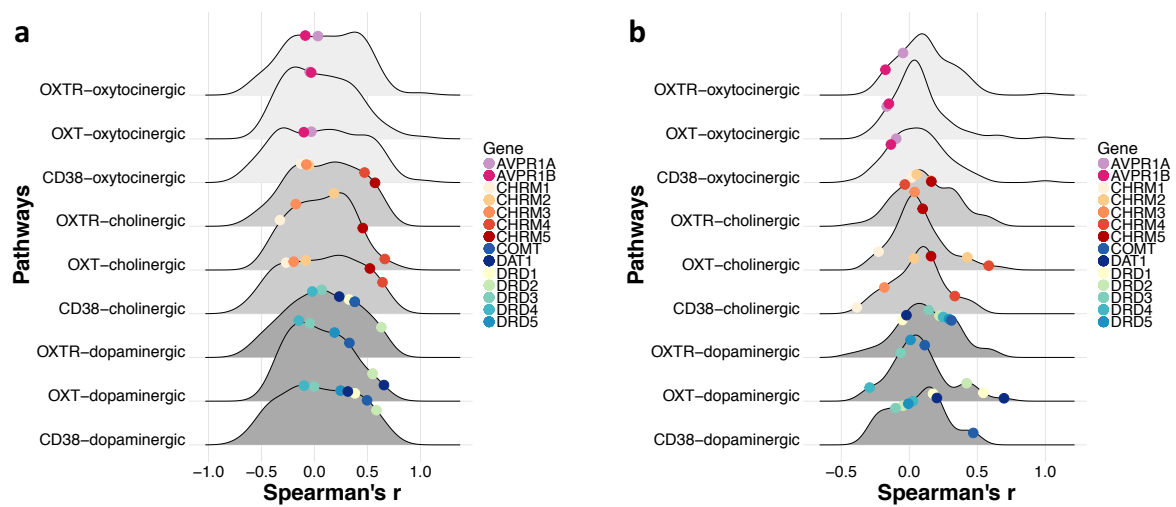

**Supplementary Table S1. Detailed donor profiles**

| <b>ID</b> | <b>Ethnicity</b> | <b>Gender</b> | <b>Age</b> | <b>Post-mortem interval (hours)</b> | <b>Number of brain samples</b> | <b>Hemisphere</b> |
|-----------|------------------|---------------|------------|-------------------------------------|--------------------------------|-------------------|
| 1         | Caucasian        | Male          | 57         | 25.5                                | 363                            | Left              |
| 2         | Caucasian        | Male          | 31         | 17.5                                | 529                            | Left              |
| 3         | Hispanic         | Female        | 49         | 30.0                                | 470                            | Left              |
| 4         | Caucasian        | Male          | 55         | 18.0                                | 501                            | Left              |
| 5         | African American | Male          | 24         | 25.0                                | 946                            | Both              |
| 6         | African American | Male          | 39         | 18.0                                | 946                            | Both              |

**Supplementary Table S2. Probe details for top Spearman's correlations between oxytocin pathway genes and all remaining genes**

|                 | OXTR     |                        |        | CD38     |                        |        | OXT     |                        |       |
|-----------------|----------|------------------------|--------|----------|------------------------|--------|---------|------------------------|-------|
|                 | Gene     | Probe                  | $\rho$ | Gene     | Probe                  | $r$    | Gene    | Probe                  | $r$   |
| Top 10 positive | NTSR2    | A_23_P315212           | 0.798  | LIX1     | A_24_P226241           | 0.815  | GSTCD   | CUST_5255_PI416261804  | 0.81  |
|                 | GLUD2    | CUST_287_PI416408490   | 0.783  | NTSR2    | A_23_P315212           | 0.813  | UMOD    | A_23_P158775           | 0.80  |
|                 | GLUD1    | A_23_P138665           | 0.777  | SPX      | CUST_15484_PI416261804 | 0.810  | WFDC10B | A_32_P951              | 0.80  |
|                 | KCNN3    | A_23_P126167           | 0.777  | SLC14A1  | A_23_P55616            | 0.803  | THTPA   | CUST_12922_PI416261804 | 0.78  |
|                 | THBS4    | A_24_P260443           | 0.762  | PSAT1    | CUST_8157_PI416261804  | 0.798  | OR10H2  | A_23_P50799            | 0.79  |
|                 | HEYL     | A_23_P430658           | 0.761  | C18orf51 | CUST_6268_PI416261804  | 0.790  | SLC5A10 | CUST_4603_PI416261804  | 0.79  |
|                 | MLEC     | A_23_P2554             | 0.761  | ITGB8    | A_23_P123060           | 0.787  | SYDE1   | CUST_1989_PI416261804  | 0.79  |
|                 | LYPD1    | A_32_P101031           | 0.752  | HSDL2    | A_23_P169197           | 0.784  | KRT81   | A_23_P25187            | 0.79  |
|                 | KIAA1407 | A_32_P54616            | 0.752  | C9orf61  | A_24_P209710           | 0.783  | SEMA4G  | CUST_3578_PI416261804  | 0.79  |
|                 | ZC3HAV1  | A_23_P425224           | 0.751  | GLUD1    | A_23_P138665           | 0.783  | OR2B11  | CUST_976_PI416379584   | 0.79  |
| Top 10 negative | ST8SIA5  | A_23_P379789           | -0.621 | RTN4R    | A_23_P132175           | -0.666 | ATOH7   | A_32_P78295            | -0.32 |
|                 | KLF9     | A_23_P415401           | -0.621 | FAM153B  | A_24_P280465           | -0.671 | DGKA    | A_23_P105307           | -0.32 |
|                 | PAK7     | A_24_P344666           | -0.627 | RNF165   | A_23_P371276           | -0.676 | SLN     | A_23_P150343           | -0.32 |
|                 | SLC6A7   | CUST_1075_PI416261804  | -0.629 | SLITRK4  | A_32_P131640           | -0.677 | LTK     | A_23_P14853            | -0.32 |
|                 | C5orf13  | A_24_P149124           | -0.629 | MICAL2   | A_23_P24843            | -0.679 | CCKBR   | A_23_P162010           | -0.33 |
|                 | SRPK1    | A_23_P19543            | -0.631 | GALNT9   | A_23_P252462           | -0.682 | GPM6A   | A_23_P121545           | -0.33 |
|                 | KIAA0802 | A_23_P360605           | -0.634 | PRSS3    | A_23_P135257           | -0.684 | GARNL4  | CUST_4993_PI416261804  | -0.33 |
|                 | RBFOX3   | A_24_P142343           | -0.639 | NEUROD1  | A_23_P209484           | -0.698 | RBFOX3  | A_23_P364504           | -0.34 |
|                 | CADPS2   | CUST_12165_PI416261804 | -0.641 | CHRD     | A_23_P502047           | -0.706 | GALNT17 | A_23_P111517           | -0.35 |
|                 | CHRD     | A_23_P502047           | -0.659 | RBFOX3   | A_24_P142343           | -0.731 | TMEM240 | A_32_P161913           | -0.35 |

**Supplementary Table S3. Top 5 mental state correlations for OXTR, CD38, and OXT**

**brain mRNA maps submitted to NeuroSynth**

| Keyword      | OXTR  |      | CD38  |      | OXT   |      |
|--------------|-------|------|-------|------|-------|------|
|              | $r_s$ | Rank | $r_s$ | Rank | $r_s$ | Rank |
| Reward       | 0.351 | 90   | 0.332 | 141  | 0.131 | 4434 |
| Regulation   | 0.307 | 84   | 0.258 | 355  | 0.053 | 6387 |
| Anticipation | 0.197 | 493  | 0.25  | 27   | 0.135 | 2980 |
| Monetary     | 0.23  | 166  | 0.252 | 56   | 0.122 | 3371 |
| Inhibition   | 0.093 | 3532 | 0.221 | 56   | 0.109 | 2631 |
| Incentive    | 0.261 | 20   | 0.222 | 169  | 0.109 | 3471 |
| Learning     | 0.073 | 7469 | 0.163 | 2491 | 0.117 | 4753 |
| Seeking      | 0.129 | 1923 | 0.171 | 379  | 0.098 | 3900 |
| Pain         | 0.22  | 1244 | 0.219 | 1266 | 0.143 | 3830 |
| Unpleasant   | 0.201 | 1638 | 0.147 | 1701 | 0.154 | 1438 |
| Aversive     | 0.198 | 245  | 0.149 | 1334 | 0.126 | 2308 |
| Threat       | 0.201 | 87   | 0.154 | 512  | 0.095 | 2680 |
| Anxiety      | 0.351 | 12   | 0.266 | 434  | 0.133 | 4111 |
| Emotional    | 0.329 | 63   | 0.198 | 1069 | 0.053 | 6305 |
| Stress       | 0.319 | 56   | 0.266 | 403  | 0.102 | 4973 |

*Note.* After retrieving the mental state terms with the 5 strongest relationships with the OXTR map, we skipped duplicate terms when retrieving the 5 strongest relationships with the CD38 map and the repeated this process (skipping duplicates) with the OXT map. Ranks represent the overall rank for correlation between the OXTR, CD38, and OXT gene maps and the given terms compared to all 20737 genes maps.
